# Supplementary material
Source: publisher figshare collection journal article supplement (https://sage.figshare.com/ndownloader/files/23482551)

# Disparities in Dental Use and Untreated Caries Prevalence by Income

S.O. Griffin, G. Thornton-Evans, L. Wei, and P.M. Griffin

## Appendix

Appendix Figure 1a

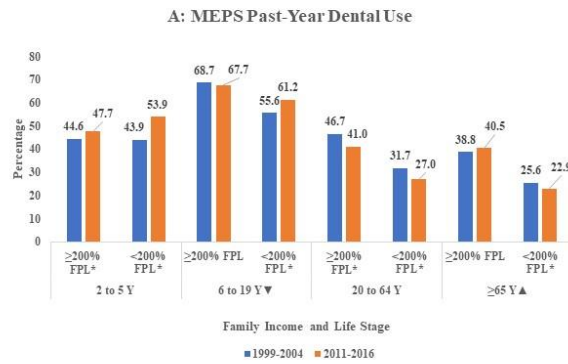

Appendix Figure 1b

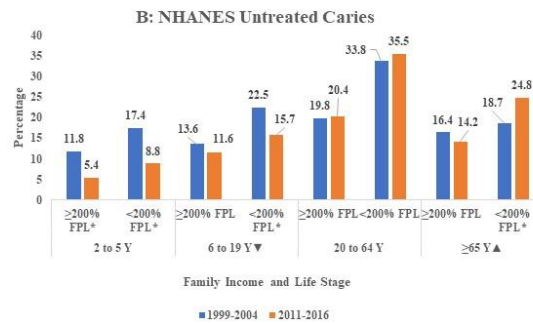

Supplement: Supplementary file 1 [file 23482551]
